# Supplementary material for: Optimization of fermentation conditions for physcion production of Aspergillus chevalieri BYST01 by response surface methodology
Source: PeerJ. 2024 Oct 30;12:e18380. doi: 10.7717/peerj.18380 (PMC11531253; doi:10.7717/peerj.18380)
Supplement: Supplemental Information 1 [file peerj-12-18380-s001.xls]

## Sheet: carbon source
				y:area	x：ug/mL
				y=18462x-22450
			11d
					retention time	area		x	Before dilution(ug/L)	total ug（1L）	mg/L		mean value	sd stdeva
					9.557	270975	293425	15.8935	31.7869	31786.9	31.7869
				glucose	9.56	180918	203368	11.0155	22.031	22031	22.031		30.3305	7.67562
					9.544	320699	343149	18.5868	37.1735	37173.5	37.1735
					9.544	193199	215649	11.6807	23.3614	23361.4	23.3614
				maltose	9.575	166263	188713	10.2217	20.4434	20443.4	20.4434		18.5789	5.93851
					9.565	87693	110143	5.96593	11.9319	11931.9	11.9319
					9.554	65296	87746	4.75279	9.50558	9505.58	9.50558
				,xylose	9.559	43537	65987	3.57421	7.14841	7148.41	7.14841		7.50766	2.79771
					9.565	11583	34033	1.84341	3.68682	3686.82	3.68682
					9.558	66997	89447	4.84492	9.68985	9689.85	9.68985
					9.559	99007	121457	6.57876	13.1575	13157.5	13.1575
					9.566	49732	72182	3.90976	7.81952	7819.52	7.81952		10.0515	2.36036
				sucrose	9.565	74818	97268	5.26855	10.5371	10537.1	10.5371
					9.57	57783	80233	4.34585	8.69169	8691.69	8.69169
				fructose	9.559	38966	61416	3.32662	6.65323	6653.23	6.65323
					9.564	84055	106505	5.76888	11.5378	11537.8	11.5378		10.0078	2.90887
					9.553	86775	109225	5.91621	11.8324	11832.4	11.8324

## Sheet: concentrations of glucose
				y:area	x：ug/mL
				y=18462x-22450
					retention time	area		x	Before dilution(ug/L)	total ug（1L）	mg/L		mean value	sd stdeva
			11d
				10g/L-1	9.493	10460	32910	1.78258	3.56516	3565.16	3.56516
				10g/L-2	9.43	12950	35400	1.91745	3.8349	3834.9	3.8349		3.74203	0.153236
				10g/L-3	9.529	12868	35318	1.91301	3.82602	3826.02	3.82602
				20g/L-1	9.54	246989	269439	14.5942	29.1885	29188.5	29.1885
				20g/L-2	9.556	207684	230134	12.4653	24.9306	24930.6	24.9306		28.1975	2.90123
				20g/L-3	9.515	258849	281299	15.2366	30.4733	30473.3	30.4733
				30g/L-1	9.486	417442	439892	23.8269	47.6538	47653.8	47.6538
				30g/L-2	9.42	349166	371616	20.1287	40.2574	40257.4	40.2574		43.6081	3.74684
				30g/L-3	9.507	373682	396132	21.4566	42.9132	42913.2	42.9132
				40g/L-1	9.553	113050	135500	7.3394	14.6788	14678.8	14.6788
				40g/L-2	9.47	152844	175294	9.49485	18.9897	18989.7	18.9897		14.2288	5.00107
				40g/L-3	9.537	60795	83245	4.50899	9.01798	9017.98	9.01798

## Sheet: nitrogen source
				y:area	x：ug/mL
				y=18462x-22450
			11d
					retention time	area		x	Before dilution(ug/L)	total ug（1L）	mg/L		mean value	sd stdeva
				glycine-1	9.53	94240	116690	6.32055	12.6411	12641.1	12.6411
				glycine-2	9.535	94978	117428	6.36052	12.721	12721	12.721		12.7407	0.110787
				glycine-3	9.53	96261	118711	6.43002	12.86	12860	12.86
				urea-1	9.528	8643	31093	1.68416	3.36832	3368.32	3.36832
				urea-2	9.543	13108	35558	1.92601	3.85202	3852.02	3.85202		3.55473	0.260219
				urea-3	9.565	9340	31790	1.72192	3.44383	3443.83	3.44383
				NH4Cl-1	9.595	47779	70229	3.80398	7.60795	7607.95	7.60795
				NH4Cl-2	9.592	49490	71940	3.89665	7.79331	7793.31	7.79331		7.72639	0.102861
				NH4Cl-3	9.602	49348	71798	3.88896	7.77792	7777.92	7.77792
				(NH4)2SO4-1	9.596	52418	74868	4.05525	8.1105	8110.5	8.1105
				(NH4)2SO4-2	9.595	41764	64214	3.47817	6.95634	6956.34	6.95634		7.52613	0.577216
				(NH4)2SO4-3	9.586	46889	69339	3.75577	7.51154	7511.54	7.51154
				(NH4)2SO4-1	9.586	59263	81713	4.42601	8.85202	8852.02	8.85202
				(NH4)2SO4-2	9.592	36062	58512	3.16932	6.33864	6338.64	6.33864		6.62565	2.09765
				(NH4)2SO4-3	9.611	20809	43259	2.34314	4.68627	4686.27	4.68627

## Sheet: inorganic salts
				y:area	x：ug/mL
				y=18462x-22450
			11d
					retention time	area		x	Before dilution(ug/L)	total ug（1L）	mg/L		mean value	sd stdeva
				CH3COONa-1	9.631	4052	26502	1.43549	2.87098	2870.98	2.87098
				CH3COONa-2	9.699	3263	25713	1.39275	2.78551	2785.51	2.78551		2.76843	0.112073
				CH3COONa-3	9.685	2001	24451	1.3244	2.64879	2648.79	2.64879
				KCl-1	9.628	4739	27189	1.4727	2.9454	2945.4	2.9454
				KCl-2	9.698	7039	29489	1.59728	3.19456	3194.56	3.19456		3.17773	0.224393
				KCl-3	9.706	8873	31323	1.69662	3.39324	3393.24	3.39324
				CaSO4-1	9.657	1982	24432	1.32337	2.64673	2646.73	2.64673
				CaSO4-2	9.747	1331	23781	1.28811	2.57621	2576.21	2.57621		2.60831	0.0356838
				CaSO4-3	9.568	1569	24019	1.301	2.60199	2601.99	2.60199
				NaCl-1	9.649	3484	25934	1.40472	2.80945	2809.45	2.80945
				NaCl-2	9.709	3116	25566	1.38479	2.76958	2769.58	2.76958		2.7763	0.0303535
				NaCl-3	9.724	2934	25384	1.37493	2.74986	2749.86	2.74986
				FeCl3-1	nd
				FeCl3-2	nd
				FeCl3-3	nd
				MnCl2-1	nd
				MnCl2-2	nd
				MnCl2-3	nd
