# Supplementary material for: Optimization of fermentation conditions for physcion production of Aspergillus chevalieri BYST01 by response surface methodology
Source: PeerJ. 2024 Oct 30;12:e18380. doi: 10.7717/peerj.18380 (PMC11531253; doi:10.7717/peerj.18380)
Supplement: Supplemental Information 2 [file peerj-12-18380-s002.xls]

## Sheet: time
				y:area	x：ug/mL
				y=18462x-22450
					retention time	area		x	Before dilution(ug/L)	total ug（1L）	mg/L		mean value	sd stdeva
				D7-1	9.551	92155	114605	6.20762	12.4152	12415.2	12.4152
			7d	D7-2	9.505	85297	107747	5.83615	11.6723	11672.3	11.6723		11.7181	0.675415
				D7-3	9.598	79707	102157	5.53337	11.0667	11066.7	11.0667
				D9-1	9.558	200224	222674	12.0612	24.1224	24122.4	24.1224
			9d	D9-2	9.427	141121	163571	8.85987	17.7197	17719.7	17.7197		20.3417	3.35491
				D9-3	9.673	154629	177079	9.59154	19.1831	19183.1	19.1831
				D11-1	9.537	320776	343226	18.5909	37.1819	37181.9	37.1819
			11d	D11-2	9.667	339274	361724	19.5929	39.1858	39185.8	39.1858		40.0632	3.40579
				D11-3	9.525	382069	404519	21.9109	43.8218	43821.8	43.8218
				D13-1	9.764	329116	351566	19.0427	38.0854	38085.4	38.0854
			13d	D13-2	9.775	319880	342330	18.5424	37.0848	37084.8	37.0848		37.817	0.641602
				D13-3	9.791	330921	353371	19.1405	38.2809	38280.9	38.2809
				D15-1	9.683	243070	265520	14.382	28.7639	28763.9	28.7639
			15d	D15-2	9.768	188602	211052	11.4317	22.8634	22863.4	22.8634		24.6141	3.60844
				D15-3	9.74	182617	205067	11.1075	22.215	22215	22.215
				D17-1	9.699	81960	104410	5.6554	11.3108	11310.8	11.3108
			17d	D17-2	9.637	52386	74836	4.05352	8.10703	8107.03	8.10703		10.2827	1.88517
				D17-3	9.617	83064	105514	5.7152	11.4304	11430.4	11.4304

## Sheet: temperature
				y:area	x：ug/mL
				y=18462x-22450
			11d
					retention time	area		x	Before dilution(ug/L)	total ug（1L）	mg/L		mean value	sd stdeva
				20℃	9.781	2805	25255	1.36794	2.73589	2735.89	2.73589
					9.772	6452	28902	1.56549	3.13097	3130.97	3.13097		2.93197	0.197557
					9.751	4588	27038	1.46452	2.92904	2929.04	2.92904
					9.645	20449	42899	2.32364	4.64728	4647.28	4.64728
				22℃	9.678	21822	44272	2.39801	4.79601	4796.01	4.79601		4.84631	0.228383
					9.571	24588	47038	2.54783	5.09566	5095.66	5.09566
					9.407	23920	46370	2.51165	5.02329	5023.29	5.02329
				24℃	9.381	25369	47819	2.59013	5.18026	5180.26	5.18026		4.88394	0.385378
					9.364	18612	41062	2.22414	4.44827	4448.27	4.44827
					9.394	177166	199616	10.8123	21.6245	21624.5	21.6245
				26℃	9.375	176082	198532	10.7535	21.5071	21507.1	21.5071		21.6713	0.191896
					9.351	179545	201995	10.9411	21.8822	21882.2	21.8822
					9.537	320776	343226	18.5909	37.1819	37181.9	37.1819
				28℃	9.667	339274	361724	19.5929	39.1858	39185.8	39.1858		40.0632	3.40579
					9.525	382069	404519	21.9109	43.8218	43821.8	43.8218
					9.353	62444	84894	4.59831	9.19662	9196.62	9.19662
				30℃	9.374	76736	99186	5.37244	10.7449	10744.9	10.7449		9.53678	1.07902
					9.325	57572	80022	4.33442	8.66883	8668.83	8.66883
					9.406	4593	27043	1.46479	2.92959	2929.59	2.92959
				32℃	9.42	3453	25903	1.40304	2.80609	2806.09	2.80609		3.00332	0.242656
					9.435	7775	30225	1.63715	3.27429	3274.29	3.27429

## Sheet: initial pH
				y:area	x：ug/mL
				y=18462x-22450
		11d				area(y)		x	Before dilution(ug/L)	total mg（1L）	mg/L		mean value（mg/mL）	sd stdeva
				pH 4.0	9.568	166175	188625	10.2169	20.4339	20433.9	20.4339
				pH 4.0	9.591	176298	198748	10.7652	21.5305	21530.5	21.5305		21.3352	0.821306
				pH 4.0	9.607	181013	203463	11.0206	22.0413	22041.3	22.0413
				pH 4.5	9.542	203199	225649	12.2223	24.4447	24444.7	24.4447
				pH 4.5	9.565	246263	268713	14.5549	29.1098	29109.8	29.1098		26.6388	2.34487
				pH 4.5	9.587	220896	243346	13.1809	26.3618	26361.8	26.3618
				pH 5.0	9.561	258792	281242	15.2336	30.4671	30467.1	30.4671
				pH 5.0	9.581	313340	335790	18.1882	36.3763	36376.3	36.3763		35.1121	4.15952
				pH 5.0	9.544	332877	355327	19.2464	38.4928	38492.8	38.4928
				pH 5.5	9.532	284258	306708	16.6129	33.2259	33225.9	33.2259
				pH 5.5	9.581	319952	342402	18.5463	37.0926	37092.6	37.0926		36.0694	2.49462
				pH 5.5	9.565	327310	349760	18.9449	37.8897	37889.7	37.8897
				pH 6.0	9.523	418721	441171	23.8962	47.7923	47792.3	47.7923
				pH 6.0	9.534	481217	503667	27.2813	54.5626	54562.6	54.5626		49.701	4.24244
				pH 6.0	9.567	409083	431533	23.3741	46.7482	46748.2	46.7482
				pH 6.5	9.549	699074	721524	39.0816	78.1631	78163.1	78.1631
				pH 6.5	9.503	608129	630579	34.1555	68.311	68311	68.311		74.5448	5.42182
				pH 6.5	9.57	689815	712265	38.5801	77.1601	77160.1	77.1601
				pH 7.0	9.543	336320	358770	19.4329	38.8658	38865.8	38.8658
				pH 7.0	9.549	294168	316618	17.1497	34.2994	34299.4	34.2994		37.1888	2.51302
				pH 7.0	9.58	332031	354481	19.2006	38.4011	38401.1	38.4011
				pH 7.5	9.572	230504	252954	13.7013	27.4027	27402.7	27.4027
				pH 7.5	9.579	267308	289758	15.6948	31.3897	31389.7	31.3897		29.6104	2.02773
				pH 7.5	9.58	254838	277288	15.0194	30.0388	30038.8	30.0388
				pH 8.O	9.579	54342	76792	4.15946	8.31893	8318.93	8.31893
				pH 8.O	9.567	55188	77638	4.20529	8.41057	8410.57	8.41057		8.94923	1.01339
				pH 8.0	9.539	70951	93401	5.05909	10.1182	10118.2	10.1182

## Sheet: speed of the rotary shaker
				y:area	x：ug/mL
				y=18462x-22450
					retention time	area		x	Before dilution(ug/L)	total ug（1L）	mg/L		mean value	sd stdeva
		11d
		pH 6.5
				90rpm-1	9.51	13549	35999	1.9499	3.89979	3899.79	3.89979
				90rpm-2	9.509	8694	31144	1.68692	3.37385	3373.85	3.37385		3.44296	0.426494
				90rpm-3	9.496	5753	28203	1.52762	3.05525	3055.25	3.05525
				120rpm-1		15920	38370	2.07832	4.15665	4156.65	4.15665
				120rpm-2		25796	48246	2.61326	5.22652	5226.52	5.22652		4.48496	0.643612
				120rpm-3		15136	37586	2.03586	4.07171	4071.71	4.07171
				150rpm-1	9.557	218165	240615	13.033	26.066	26066	26.066
				150rpm-2	9.462	218469	240919	13.0495	26.0989	26098.9	26.0989		26.151	0.119908
				150rpm-3	9.465	220216	242666	13.1441	26.2882	26288.2	26.2882
				180-1	9.549	699074	721524	39.0816	78.1631	78163.1	78.1631
				180-2	9.503	608129	630579	34.1555	68.311	68311	68.311		74.5448	5.42182
				180-3	9.57	689815	712265	38.5801	77.1601	77160.1	77.1601
				210-1	9.574	99198	121648	6.5891	13.1782	13178.2	13.1782
				210-2	9.532	103656	126106	6.83057	13.6611	13661.1	13.6611		14.0002	1.03412
				210-3	9.507	117504	139954	7.58065	15.1613	15161.3	15.1613
				240-1	9.434	28999	51449	2.78675	5.5735	5573.5	5.5735
				240-2	9.473	24678	47128	2.5527	5.10541	5105.41	5.10541		5.33601	0.234125
				240-3	9.445	26743	49193	2.66455	5.32911	5329.11	5.32911
